# Supplementary material
Source: MDPI journal article supplement (https://www.mdpi.com/2673-9917/2/4/38)
Supplement: s1 [file s1]

**Supplementary Table S1.** Summary of published records, bottom biocenosis, habitat, and depth of *Rissoides pallidus* within the Mediterranean Basin.

| GSA | Med. basin | Locality                        | Coordinates     | Date      | Bottom                                 | Depth (m) | N          | CL (mm)          | TL (mm)            | Reference |
|-----|------------|---------------------------------|-----------------|-----------|----------------------------------------|-----------|------------|------------------|--------------------|-----------|
| 1   | Western    | -                               |                 |           |                                        |           |            |                  |                    |           |
| 1   | Western    | Gulf of Vera                    |                 |           |                                        |           |            |                  |                    |           |
| 5   | Western    | Eivissa Island                  |                 |           |                                        |           |            |                  |                    |           |
| 6   | Western    | Off Alacant                     | -               | 1994-1999 | -                                      | 117-523   | 21         | -                | -                  | [33]      |
| 6   | Western    | Off Valencia                    |                 |           |                                        |           |            |                  |                    |           |
| 6   | Western    | Ebro delta                      |                 |           |                                        |           |            |                  |                    |           |
| 6   | Western    | North Catalonia                 |                 |           |                                        |           |            |                  |                    |           |
| 6   | Western    | Cabo de Creus                   | 41°33'N 03°17'E | 1977      | -                                      | 290-300   | 3♂         | 13 - 15          |                    | [29]      |
|     |            | Cabo de La Nao                  |                 |           |                                        |           |            |                  |                    |           |
| 6   | Western    | Vilanova, Catalonia             | 41°5'N 1°45'E   | 1991      | terrigenous mud                        | 110-247   | 1♂         | 7                | 35                 | [33]      |
| 6   | Western    | Blanes, Catalonia               | 41°35'N 2°48'E  | 1991      | terrigenous mud                        | 110-113   | 1♂         | 14               | 65                 |           |
|     |            |                                 |                 |           |                                        |           |            |                  | 50                 |           |
| 9   | Western    | Off Punta Mesco                 | -               | 1975      | -                                      | 435-500   | 1♀         | -                | 52                 | [31]      |
|     |            |                                 |                 |           |                                        |           |            |                  |                    |           |
| 9   | Western    | Off Giglio Island               | -               | 1985      | -                                      | 307       | 1♂         | -                | 62 - 68            | [31]      |
|     |            |                                 |                 |           |                                        |           |            |                  |                    |           |
| 9   | Western    | South of Elba Island            | -               | 1985      | -                                      | 245       | 1♀         | -                | 61                 | [31]      |
|     |            |                                 |                 |           |                                        |           |            |                  |                    |           |
| 9   | Western    | Off Elba Island                 | -               | 1985-1986 | bathyal mud<br>detritic<br>biocoenoses | 190-335   | 6♂<br>7♀   | -                | -                  | [30]      |
|     |            |                                 |                 |           |                                        |           |            |                  |                    |           |
| 9   | Western    | Off Anzio                       | 41°11'N 12°39'E | 1987      | -                                      | 275       | 1♀         | -                | 68                 | [31]      |
|     |            |                                 | 41°08'N 12°45'E | 1987      | -                                      | 340       | 1♀         | -                | 70                 | [31]      |
| 9   | Western    | West of Giglio Island           |                 | 1989      | -                                      | 200       | 2♀         | -                | -                  | [43]      |
| 9   | Western    | East of Giglio Island           |                 | 1991      | -                                      | 500       | 1♂         | -                | -                  | [43]      |
|     |            |                                 |                 |           |                                        |           |            |                  |                    |           |
| 9   | Western    | Off Chiavari,<br>Capo Mele      |                 | 1991-1994 | bathyal mud                            |           | 5♂<br>5♀   | -<br>-           | 46 - 61<br>45 - 55 | [27]      |
|     |            |                                 |                 |           |                                        |           |            |                  |                    |           |
| 9   | Western    | Off Livorno                     |                 | 1994      | -                                      | -         | 1♀         | -                | -                  | [43]      |
|     |            |                                 |                 |           |                                        |           |            |                  |                    |           |
| 9   | Western    | Tuscany Archipelago             | -               | 1994-1996 | -                                      | 250-550   | 75♂<br>84♀ | 8 - 16<br>8 - 15 | 36 - 68<br>35 - 66 | [41]      |
|     |            |                                 |                 |           |                                        |           |            |                  |                    |           |
| 9   | Western    | Tuscany and Latium<br>coasts    | -               | 1994-1997 | -                                      | -         | -          | -                | -                  | [35]      |
|     |            |                                 |                 |           |                                        |           |            |                  |                    |           |
| 9   | Western    | Giglio, Montecristo,<br>Pianosa | -               | 1995-1999 | -                                      | 300-650   | -          | -                | -                  | [38]      |
|     |            |                                 |                 |           |                                        |           |            |                  |                    |           |
| 9   | Western    | Western<br>coasts of Italy      | -               | 1997-2001 | detritic<br>organogenic<br>sediments   | 10-700    | -          | -                | -                  | [39]      |

|      |         |                          |                 |           |                                         |         |          |    |                    |                  |
|------|---------|--------------------------|-----------------|-----------|-----------------------------------------|---------|----------|----|--------------------|------------------|
| 10   | Western | Gulf of Naples           | -               | -         | -                                       | 110     | -        | -  | -                  | [25]             |
| 10   | Western | Gulf of Patti            | -               | 1970      | -                                       | 500     | 1♂<br>1♀ | -  | 57 - 67            | [28]             |
| 10   | Western | Gulf of Napoli           | 40°46'N 14°12'E | 1986      | -                                       | 218     | 3♂       | -  | 70 - 73            | [31]             |
| 10   | Western | Gulf of Salerno          | 40°28'N 14°42'E | 1986      | -                                       | 264-277 | 1♀       | -  | 61                 | [31]             |
| 10   | Western | Off Capo Bonifati        | 39°36'N 15°40'E | 1986      | -                                       | 370-403 | 4♀       | -  | 57 - 68            | [31]             |
| 10   | Western | SW of Gaeta              | 41°02'N 13°22'E | 1987      | -                                       | 325     | 3♂       | -  | 70 - 76            | [31]             |
| 11.2 | Western | Gulf of Cagliari         | 38°53'N 9°20'E  | 1985      | -                                       | 650-720 | 1♀       | -  | 66                 | [31]             |
|      |         |                          | 39°01'N 9°17'E  | 1986      | -                                       | 580-610 | 1♀       | -  | 58                 | [31]             |
| 11.2 | Western | -                        | -               | 1992      | -                                       | 100-388 | -        | -  | 46-76              | [32]             |
| 11.2 | Western | Off Cagliari             | -               | 1992      | -                                       | -       | 1♂       | -  | -                  | [43]             |
| 12   | Central | North of Sentinelle Bank | 38°05'N 9°35'E  | 1985      | -                                       | 450-600 | 1♂       | -  | 65                 | [31]             |
| 15   | Central | Off Malta                | 35°32'N 15°17'E | 1986      | -                                       | 263     | 3♂       | -  | 55 - 65            | [31]             |
| 16   | Central | Graham Bank              | 37°05'N 13°00'E | 1990      | soft muds with<br>fluid surface<br>film | 302-337 | 1♂       | -  | 54                 | [31]             |
|      |         |                          | 37°51'N 12°40'E | 2020      | coastal detritus                        | 152     | 1♀       | 10 | 48                 | Present<br>Study |
| 16   | Central | Gigibau Bank             | 37°49'N 12°44'E | 2020      | coastal<br>terrigenous                  | 132     | 1♀       | 8  | 33                 |                  |
| 17   | Central | Incoronata Island        | 43°22'N 15°00'E | 1969      | -                                       | 125     | 1♂       | -  | 66                 | [28]             |
|      |         |                          | 43°15'N 15°00'E | 1969      | -                                       | 115-132 | 1♀       | -  | 56                 | [28]             |
|      | Central | NW of Pomo               | 43°22'N 15°00'E | 1969      | -                                       | 115-125 | 1♀       | -  | 66                 | [28]             |
|      |         |                          | 43°28'N 15°10'E | 1975      | -                                       | 200     | 3♂<br>1♀ | -  | 60 - 63            | [28]             |
|      | Central | West of Pomo             | 43°05'N 15°05'E | 1970      | epibathial muds                         | 220     | 1♂       | -  | 47                 | [28]             |
|      |         |                          | 43°05'N 15°05'E | 1977      | -                                       | -       | 2♀       | -  | 62 - 64            | [28]             |
|      |         |                          | 42°50'N 14°50'E | 1978      | -                                       | 220     | 1♀       | -  | 61                 | [31]             |
|      |         |                          | 42°59'N 14°29'E | 1978      | -                                       | 120     | 3♂<br>5♀ | -  | 64 - 70<br>65 - 75 | [31]             |
|      | Central | SW of Lucietta           | 43°28'N 15°14'E | 1973      | coarse sands                            | 133     | 3♀       | -  | 52 - 68            | [28]             |
|      | Central | NW of Isole Tremiti      | 42°11'N 15°18'E | 1973      | muddy sands                             | 104     | 1♀       | -  | 65                 | [28]             |
|      | Central | SE of Lagosta            | 42°29'N 17°11'E | 1973      | muddy sands                             | 285     | 1♂<br>1♀ | -  | 52                 | [28]             |
|      | Central | Off Gargano              | 42°09'N 16°10'E | 1985      | -                                       | 114-120 | 1♀       | -  | 46                 | [31]             |
| 18   | Central | -                        | -               | 1996-2000 | -                                       | 16-588  | -        | -  | -                  | [41]             |
| 19   | Central | -                        | -               | 2003      | -                                       | -       | -        | -  | -                  | [36]             |

|    |         |                 |                 |      |            |       |    |         |         |      |
|----|---------|-----------------|-----------------|------|------------|-------|----|---------|---------|------|
| 22 | Eastern | Datca Peninsula | -               | 1992 | mud        | 280   | 1♀ | -       | 56      | [34] |
| 22 | Eastern | Prassonisi      | -               | 1997 | -          | 63-85 | -  | -       | -       | [37] |
| 22 | Eastern | Sığacık Bay     | -               | 2008 | mud        | 550   | 3♀ | 11 - 12 | 48 - 52 | [42] |
| 23 | Eastern | Iraklion Bay    | -               | -    | silty clay | 190   | 1♀ | -       | 32      | [17] |
| 23 | Eastern | Georgioupolis   | -               | 1991 | -          | 105   | 1♂ | -       | 38      |      |
| 25 | Eastern | Off Cyprus      | -               | 1969 | -          | -     | -  | -       | -       | [26] |
| 26 | Eastern | Bardawil lagoon | -               | 1969 | -          | 91.5  | 1♀ | -       | 47      | [18] |
| 27 | Eastern | Palmahim        | 31°56'N 34°34'E | 1977 | mud        | 80    | 1♂ | -       | 45      | [18] |

**GSA, Geographical Sub-Area:** 1: Northern Alboran Sea; 5: Balearic Island; 6: Northern Spain; 9: Ligurian Sea and northern Tyrrhenian Sea; 10: Southern and central Tyrrhenian Sea; 11.2: Eastern Sardinia; 12: Northern Tunisia; 15: Malta; 16: Southern Sicily; 18: Southern Adriatic Sea; 19: Western Ionian Sea; 22: Aegean Sea; 23: Crete; 25: Cyprus; 26: Southern Levant Sea; 27: Eastern Levant Sea; **Med. Basin:** Mediterranean basin; **CL:** carapace length; **TL:** total length
